# Supplementary material for: Boosting 5-ALA-based photodynamic therapy by a liposomal nanomedicine through intracellular iron ion regulation
Source: PubMed Central journal article supplement — Acta Pharm Sin B. 2021 Apr 29;11(5):1329–40. doi: 10.1016/j.apsb.2021.03.017 (PMC8148057; doi:10.1016/j.apsb.2021.03.017), 2021-04-29
Supplement: mmc1.pdf [file mmc1.pdf]

Supporting Information for

ORIGINAL ARTICLE

## Boosting 5-ALA-based photodynamic therapy by a liposomal nanomedicine through intracellular iron ion regulation

Airong Li<sup>†</sup>, Chenglin Liang<sup>†</sup>, Lihua Xu, Yiyang Wang, Wei Liu, Kaixiang Zhang<sup>\*</sup>, Junjie Liu<sup>\*</sup>, Jinjin Shi<sup>\*</sup>

*Henan Key Laboratory of Targeting Therapy and Diagnosis for Critical Diseases, School of Pharmaceutical Sciences, Zhengzhou University, Zhengzhou 450001, China*

Received 26 August 2020; received in revised form 8 November 2020; accepted 21 November 2020

<sup>\*</sup>Corresponding authors. Tel: +86 371 67781910; fax: +86 371 67781908.

E-mail addresses: zhangkx@zzu.edu.cn (Kaixiang Zhang), liujunjie@zzu.edu.cn (Junjie Liu); shijinyxy@zzu.edu.cn (Jinjin Shi).

<sup>†</sup>These authors made equal contributions to this work.

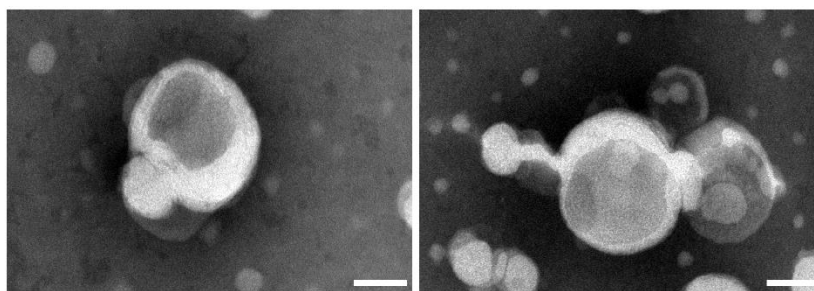

**Figure S1** The transmission electron microscope of MFLs. Scale bar = 50 nm.

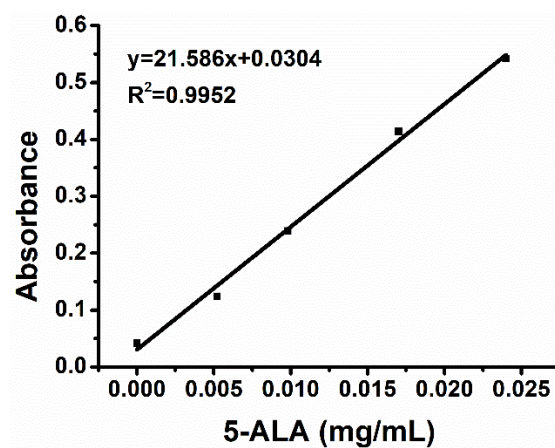

**Figure S2** The standard curve of 5-ALA.

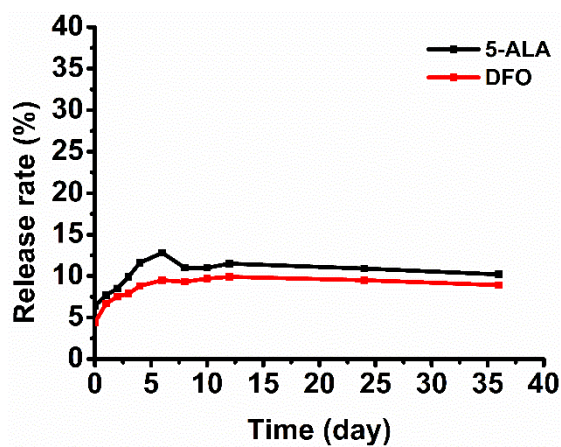

**Figure S3** The release profiles of 5-ALA and DFO from MFLs.

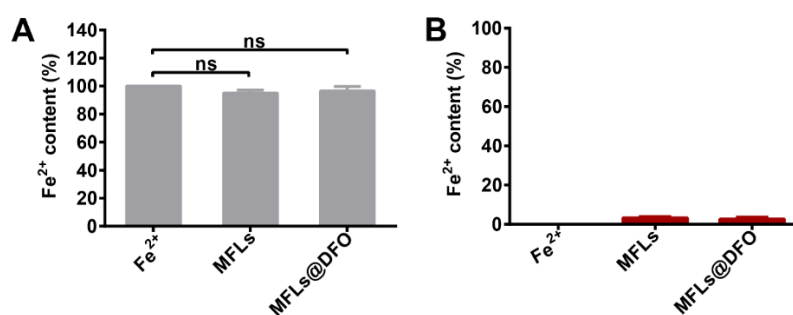

**Figure S4** The content of iron in supernatant (A) and MFLs, MFLs@DFO (B). Data are presented as means  $\pm$  SD ( $n = 3$ ). ns, not significant.

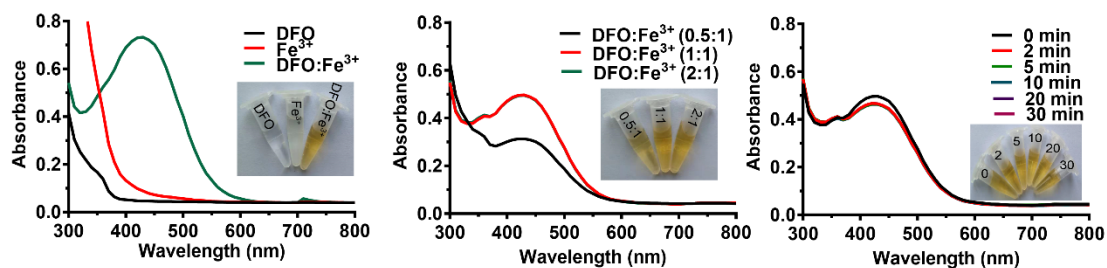

**Figure S5** The UV-Vis spectra of DFO complex  $\text{Fe}^{3+}$  at 430 nm and picture of complexing appearance (the inset).

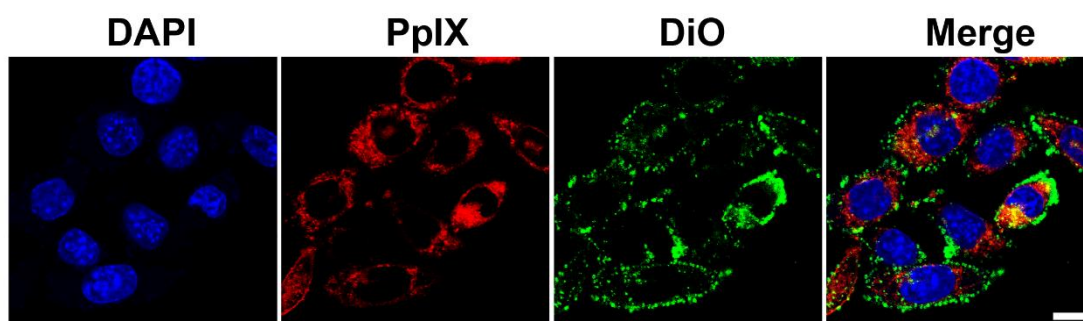

**Figure S6** The distribution of MFLs@5-ALA/DFO labeled with DiO in B16-F10 cells by CLSM. Scale bar = 10  $\mu\text{m}$ .

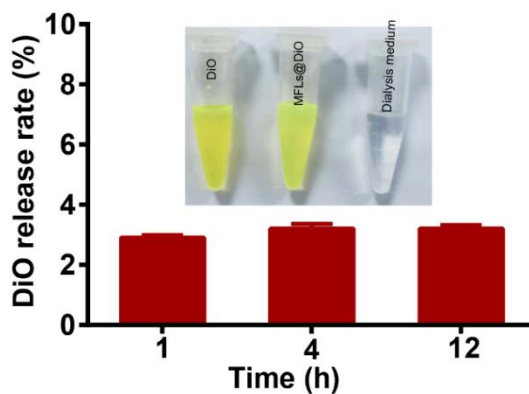

**Figure S7** The release rate of DiO from MFLS@DiO at 12 h and the appearance picture (the inset). Data are presented as means  $\pm$  SD ( $n = 3$ ).

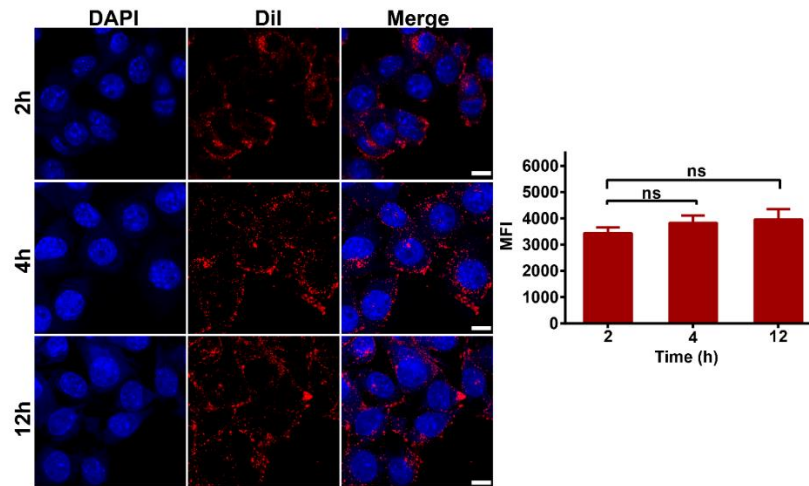

**Figure S8** The stability and semi-quantitative analysis of DiI-labeled cell membrane. Scale bar = 10  $\mu$ m. Data are presented as means  $\pm$  SD ( $n = 3$ ). ns, not significant.

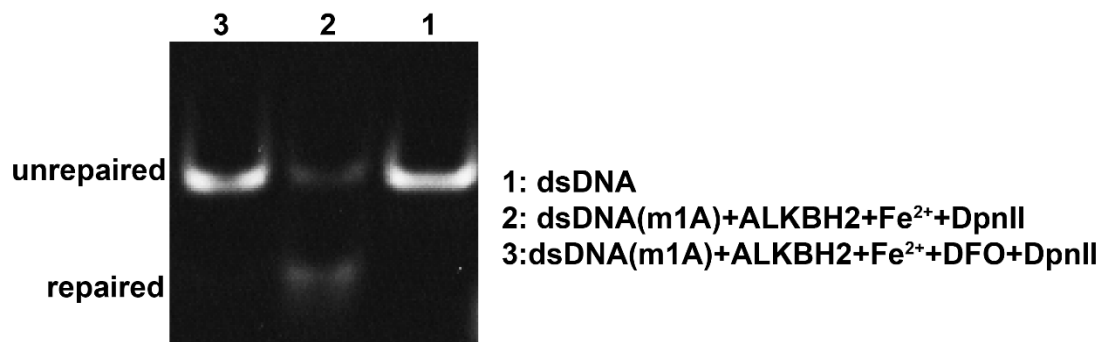

**Figure S9** DFO inhibits ALKBH2 repair of m1A in dsDNA by using the DpnII digestion assay.

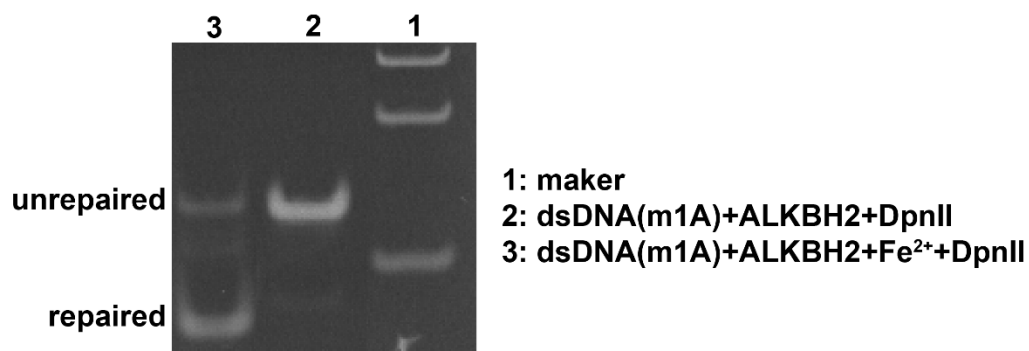

**Figure S10** The confirmation of Fe<sup>2+</sup> dependent ALKBH2 repair of m1A in dsDNA by using the DpnII digestion assay.

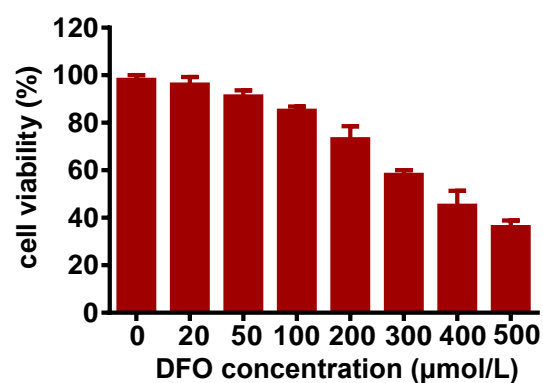

**Figure S11** The cell viability of DFO after incubated with B16-F10 cells. Data are presented as means  $\pm$ SD ( $n = 3$ ).

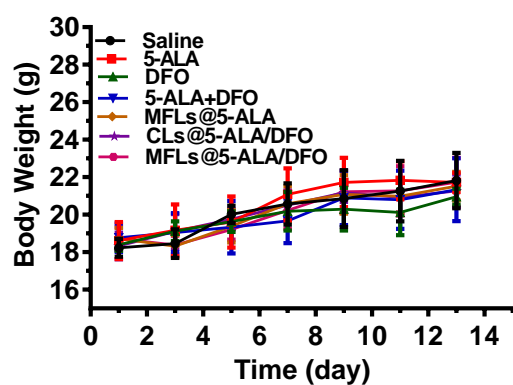

**Figure S12** The weight of tumor-bearing mice after treated 14 days with different Preparations. Data are presented as means  $\pm$ SD ( $n = 6$ ).

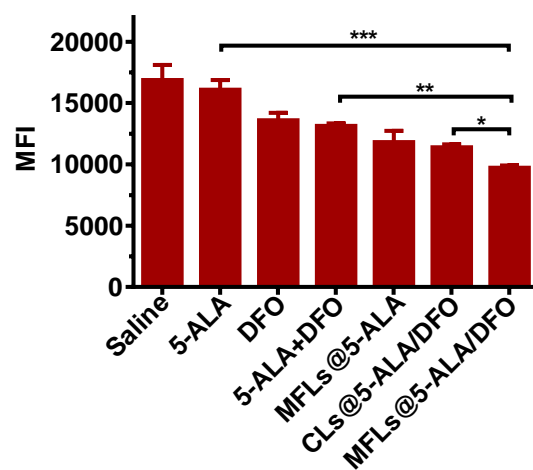

**Figure S13** The semi-quantitative analysis of  $\text{Fe}^{2+}$  in tumor tissues after treated 14 days with different preparations. Data are presented as means  $\pm$  SD ( $n = 3$ ). \*\*\* $P < 0.001$ , \*\* $P < 0.01$ , \* $P < 0.05$ .

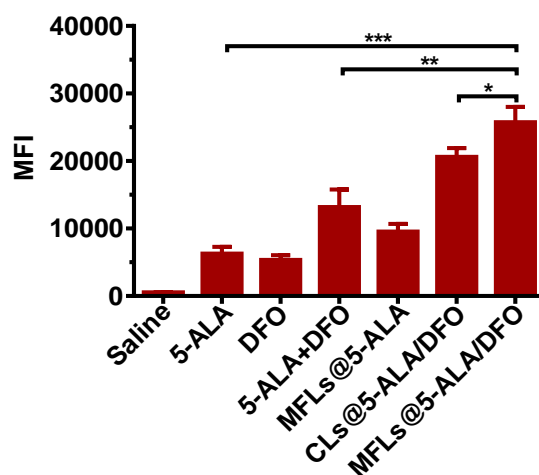

**Figure S14** The semi-quantitative analysis of PpIX in tumor tissues after treated 14 days with different preparations. Data are presented as means  $\pm$  SD ( $n = 3$ ). \*\*\* $P < 0.001$ , \*\* $P < 0.01$ , \* $P < 0.05$ .

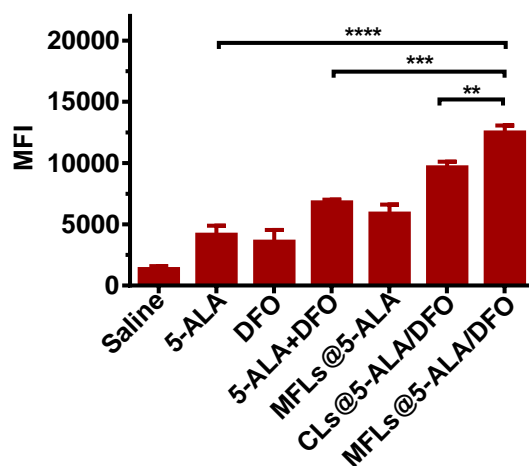

**Figure S15** The semi-quantitative analysis of ROS in tumor tissues. Data are presented as means  $\pm$  SD ( $n = 3$ ). \*\*\*\* $P < 0.0001$ , \*\*\* $P < 0.001$ , \*\* $P < 0.01$ .

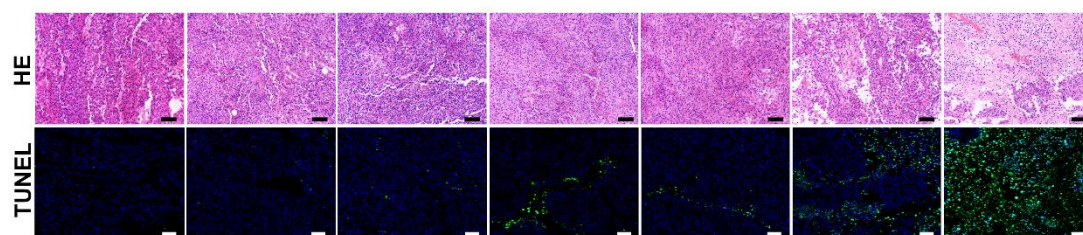

**Figure S16** H&E staining and TUNEL staining of tumor tissues. The tumor tissues were exfoliated from different groups after treated 14 days with different preparations. Scale bar = 50  $\mu$ m.

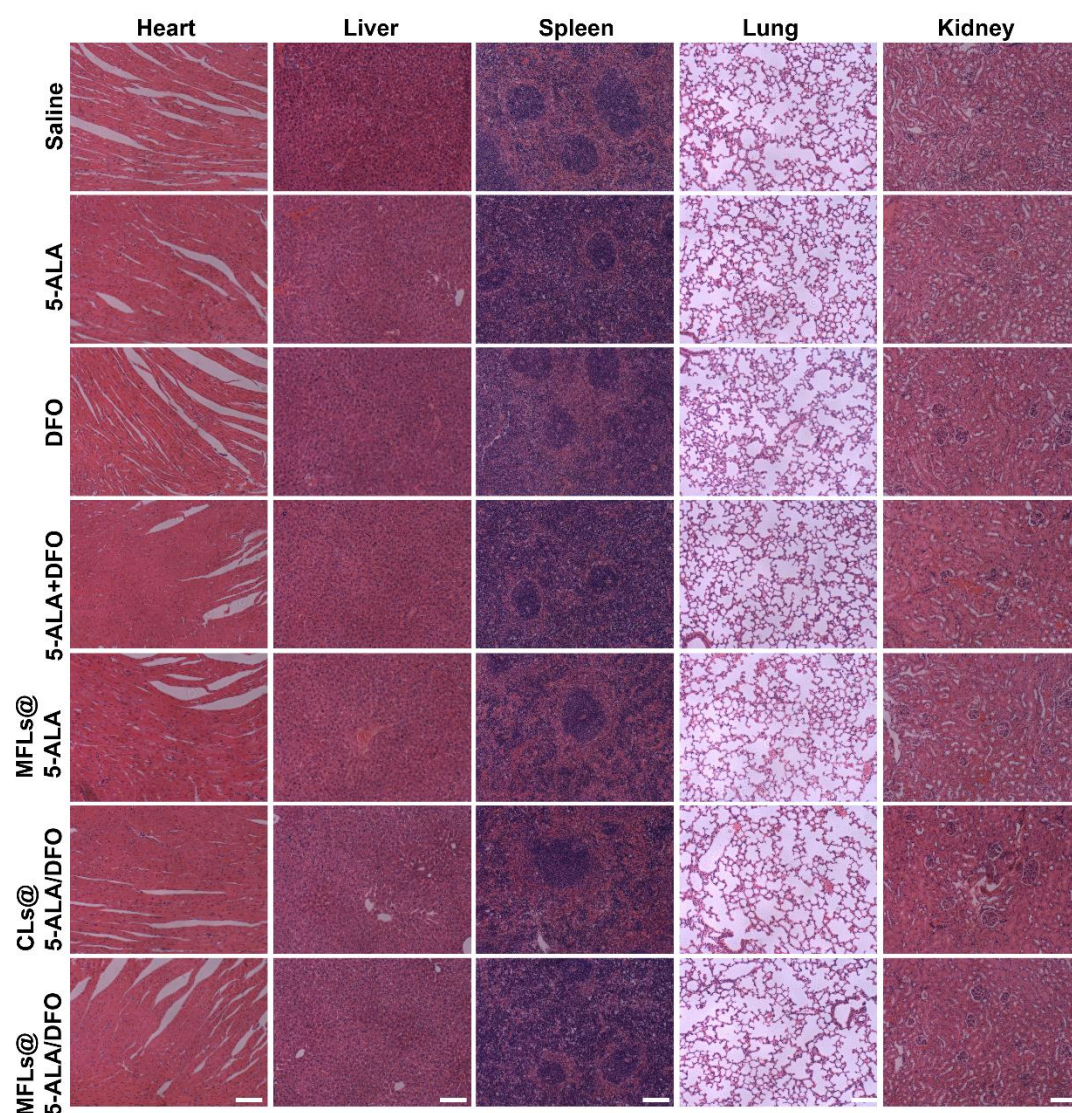

**Figure S17** The histologic assessments of major organs with H&E staining. Scale bar = 200  $\mu$ m.
